# Supplementary material
Source: PubMed Central journal article supplement (PMC3119610)

## SUPPLEMENTARY DATA

S1. Western blot showing the specificity of the different antibodies used on total protein extracts of Cadenza mature seeds.

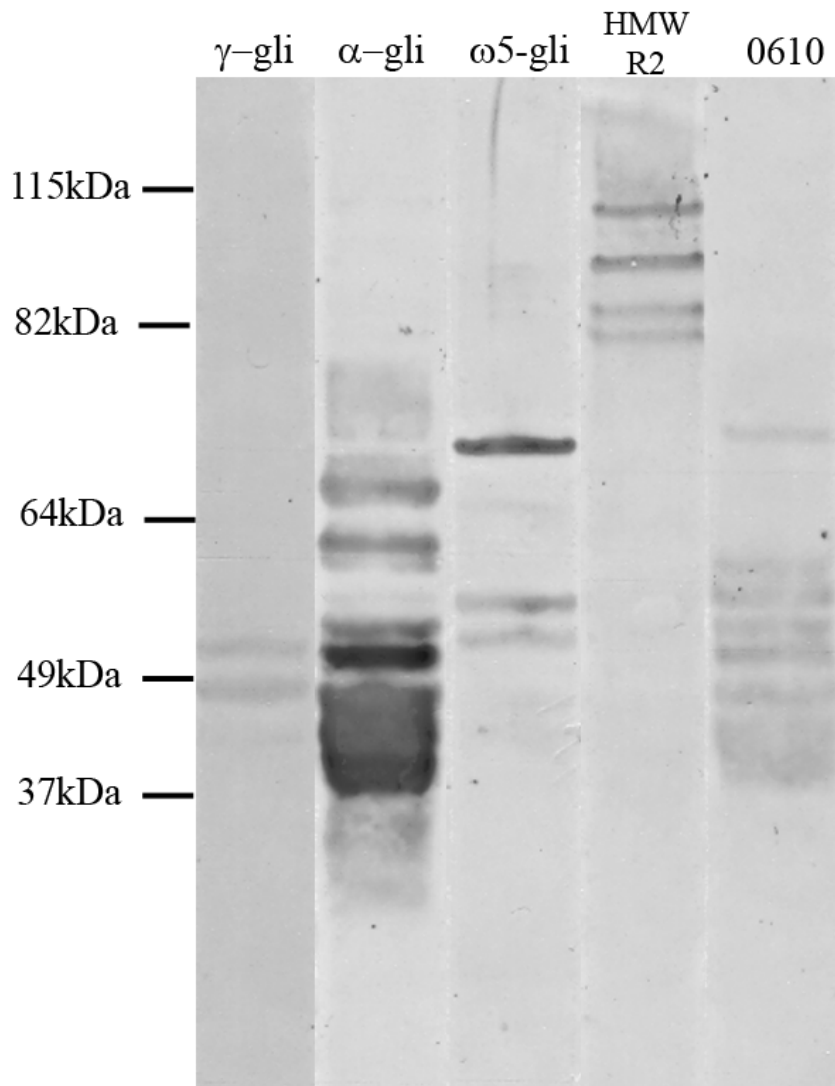

Supplement: supp_mcr098_mcr098supp_figs1.pdf [file supp_mcr098_mcr098supp_figs1.pdf]
