# Supplementary material
Source: PubMed Central journal article supplement (PMC3119610)
Supplement: supp_mcr098_mcr098supp_figs2.pdf [file supp_mcr098_mcr098supp_figs2.pdf]

## SUPPLEMENTARY DATA

### S2. Data spring wheat pearling reproducibility.

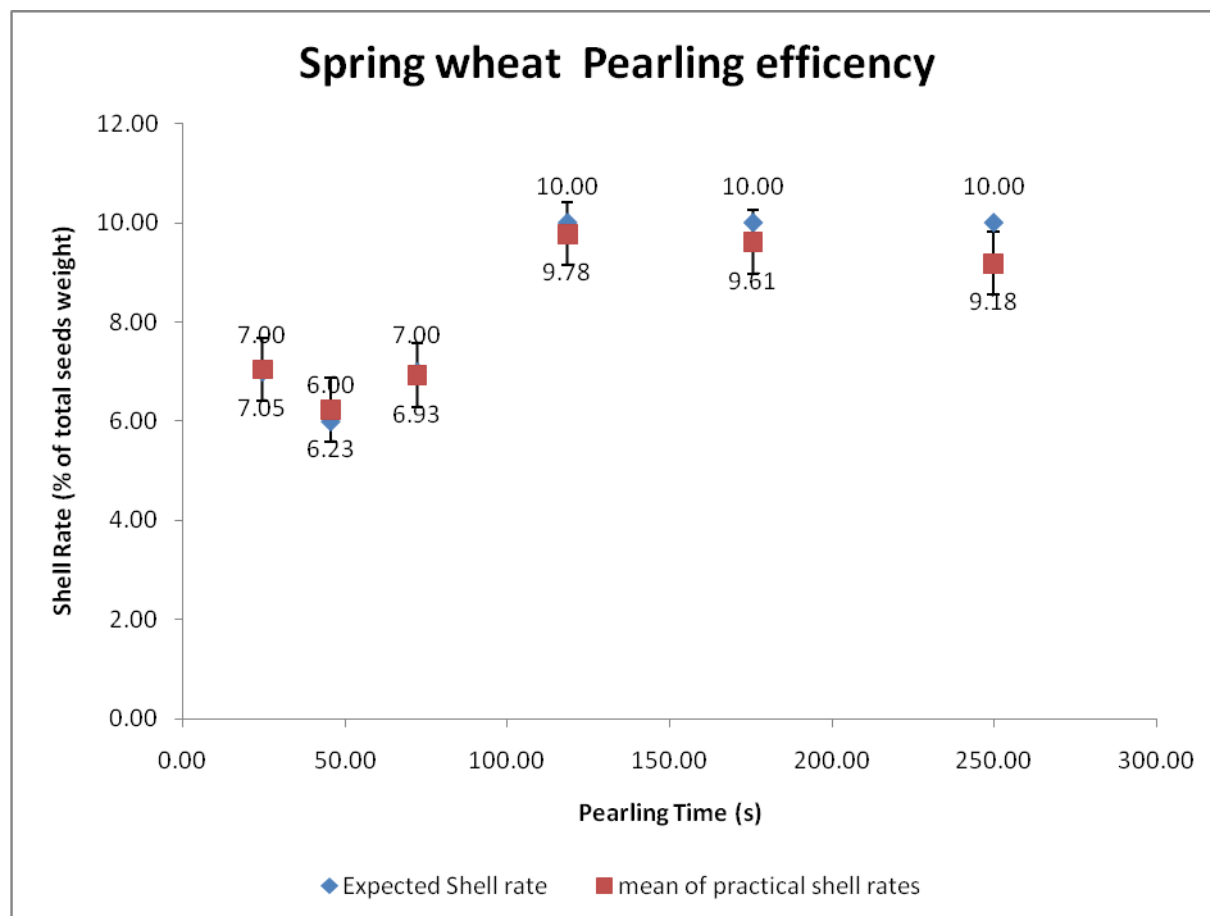

|                                                                  | Time (s)        |                 |                 |                 |                 |                 |
|------------------------------------------------------------------|-----------------|-----------------|-----------------|-----------------|-----------------|-----------------|
|                                                                  | 24.40           | 45.40           | 72.10           | 118.40          | 175.60          | 249.70          |
| Expected shell rate                                              | 7.00            | 6.00            | 7.00            | 10.00           | 10.00           | 10.00           |
| R1                                                               | 6.76            | 6.05            | 7.26            | 10.08           | 9.62            | 9.11            |
| R2                                                               | 7.09            | 6.59            | 6.83            | 9.74            | 9.68            | 8.85            |
| R3                                                               | 7.29            | 6.04            | 6.69            | 9.51            | 9.53            | 9.58            |
| Mean of observed shell rates                                     | 7.05            | 6.23            | 6.93            | 9.78            | 9.61            | 9.18            |
| s.e.                                                             | 0.15            | 0.18            | 0.17            | 0.17            | 0.04            | 0.21            |
| Approximate 95% confidence interval (mean $\pm$ 2 $\times$ s.e.) | 7.05 $\pm$ 0.30 | 6.23 $\pm$ 0.37 | 6.93 $\pm$ 0.34 | 9.78 $\pm$ 0.33 | 9.61 $\pm$ 0.09 | 9.18 $\pm$ 0.43 |

In most cases the shell rates for three biological replicates are within the approximate 95% confidence interval of the predicted shell rate.
