# Supplementary material
Source: PubMed Central journal article supplement (PMC3119610)
Supplement: supp_mcr098_mcr098supp_figs3.pdf [file supp_mcr098_mcr098supp_figs3.pdf]

## SUPPLEMENTARY DATA

### S3. Data for reproducibility of gel scan analysis.

|                                                                |                                 | 1            | 2           | 3           | 4           | 5           | 6           | Core        | whole       |
|----------------------------------------------------------------|---------------------------------|--------------|-------------|-------------|-------------|-------------|-------------|-------------|-------------|
| <b>HMW-GS</b>                                                  | R1                              | 3.70%        | 22.95%      | 25.68%      | 25.49%      | 26.56%      | 29.45%      | 20.60%      | 21.94%      |
|                                                                | R2                              | 2.57%        | 24.78%      | 27.01%      | 29.55%      | 30.20%      | 27.94%      | 22.43%      | 21.63%      |
|                                                                | R3                              | 5.88%        | 26.46%      | 26.70%      | 27.87%      | 27.33%      | 28.49%      | 25.53%      | 23.52%      |
|                                                                | R4                              | 5.44%        | 23.98%      | 24.31%      | 24.63%      | 24.30%      | 26.83%      | 23.29%      | 22.61%      |
|                                                                | Mean                            | 4.40%        | 24.54%      | 25.92%      | 26.88%      | 27.10%      | 28.18%      | 22.96%      | 22.43%      |
|                                                                | Standard deviation              | 0.02         | 0.01        | 0.01        | 0.02        | 0.02        | 0.01        | 0.02        | 0.01        |
|                                                                | <b>Coefficient of variation</b> | <b>35.07</b> | <b>6.04</b> | <b>4.70</b> | <b>8.34</b> | <b>8.99</b> | <b>3.88</b> | <b>8.91</b> | <b>3.74</b> |
| <b><math>\omega</math>-gliadins</b>                            | R1                              | 18.91%       | 20.06%      | 20.91%      | 19.86%      | 19.44%      | 19.31%      | 15.81%      | 18.74%      |
|                                                                | R2                              | 19.85%       | 21.40%      | 21.01%      | 22.01%      | 21.12%      | 20.02%      | 17.62%      | 18.81%      |
|                                                                | R3                              | 19.01%       | 21.94%      | 21.69%      | 20.93%      | 19.30%      | 18.95%      | 17.62%      | 19.17%      |
|                                                                | R4                              | 20.64%       | 21.85%      | 21.84%      | 18.98%      | 19.01%      | 17.92%      | 17.05%      | 18.01%      |
|                                                                | Mean                            | 19.60%       | 21.31%      | 21.36%      | 20.44%      | 19.72%      | 19.05%      | 17.02%      | 18.68%      |
|                                                                | Standard deviation              | 0.01         | 0.01        | 0.00        | 0.01        | 0.01        | 0.01        | 0.01        | 0.00        |
|                                                                | <b>Coefficient of variation</b> | <b>4.14</b>  | <b>4.07</b> | <b>2.20</b> | <b>6.43</b> | <b>4.83</b> | <b>4.60</b> | <b>5.01</b> | <b>2.59</b> |
| <b>LMW-GS+<math>\alpha</math>,<math>\gamma</math> gliadins</b> | R1                              | 77.39%       | 56.99%      | 53.41%      | 54.66%      | 54.00%      | 51.24%      | 63.59%      | 59.32%      |
|                                                                | R2                              | 77.58%       | 53.81%      | 51.98%      | 48.45%      | 48.68%      | 52.04%      | 59.96%      | 59.56%      |
|                                                                | R3                              | 75.11%       | 51.60%      | 51.61%      | 51.20%      | 53.37%      | 52.56%      | 56.85%      | 57.31%      |
|                                                                | R4                              | 73.91%       | 54.18%      | 53.86%      | 56.39%      | 56.69%      | 55.25%      | 59.66%      | 59.37%      |
|                                                                | Mean                            | 76.00%       | 54.15%      | 52.71%      | 52.67%      | 53.18%      | 52.77%      | 60.01%      | 58.89%      |
|                                                                | Standard deviation              | 0.02         | 0.02        | 0.01        | 0.04        | 0.03        | 0.02        | 0.03        | 0.01        |
|                                                                | <b>Coefficient of variation</b> | <b>2.35</b>  | <b>4.08</b> | <b>2.06</b> | <b>6.74</b> | <b>6.26</b> | <b>3.29</b> | <b>4.60</b> | <b>1.80</b> |

Gel proteins bands in each lane were divided into three groups corresponding to HMW-GS,  $\omega$ -gliadins and LMW glutenin subunits+  $\alpha$ ,  $\gamma$  gliadins. All but one of the coefficients of variation (highlighted in red) are lower than 10, indicating that the differences between replicates are not statistically significant.
